# Supplementary material
Source: Springer Nature journal article supplement (https://www.springermedizin.de/resource/supplementary/12960_2013_387_MOESM1_ESM.pdf/9569984)

**Number of Publications per Year**

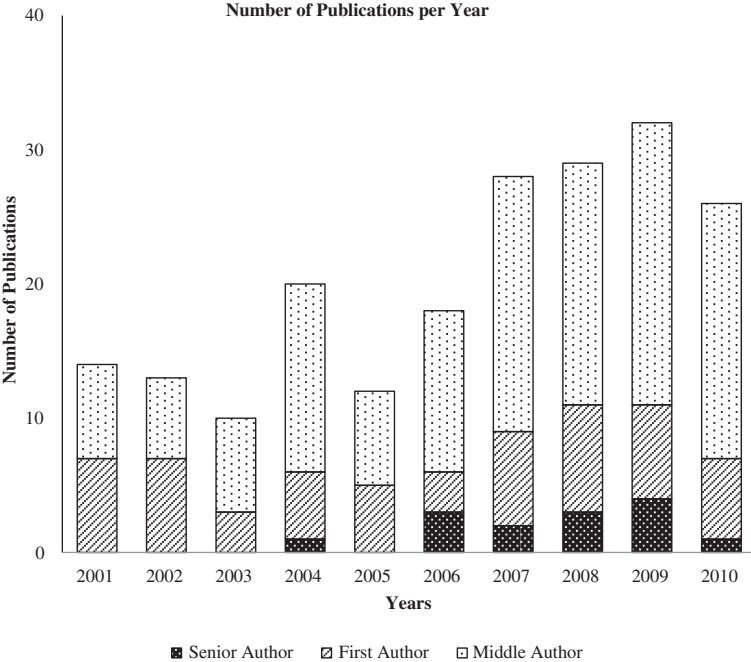

Supplement: MOESM1 [file 9569984]
